# Supplementary material
Source: PubMed Central journal article supplement (PMC7485107)
Supplement: rstb20190524supp1.pdf [file rstb20190524supp1.pdf]

## Supplementary material

Table S1: Overview of sites used in this study. Longitude (Lon), Latitude (Lat), long-term mean annual temperature (MAT) and precipitation (MAP) are according to the European Fluxes Database cluster (<http://www.europe-fluxdata.eu>) for sites in this database, and provided by site PIs accordingly otherwise. Ecosystem refers to the simplified Four-type classification used in this study. Reference years from within the period 2004-2017 were chosen based on data availability and, in case of crop rotation sites, the same crop being grown as in 2018.

| Site   | Lon  | Lat  | IGBP | MAT (°C) | MAP (mm) | Elevation (m) | Ecosystem | Reference years      | Reference |
|--------|------|------|------|----------|----------|---------------|-----------|----------------------|-----------|
| BE-Bra | 4.5  | 51.3 | MF   | 9.8      | 750      | 16            | forest    | 2004-2017            | [1]       |
| BE-Lon | 4.7  | 50.6 | CRO  | 10       | 800      | 167           | crop      | 2006, 10, 14         | [2]       |
| BE-Vie | 6.0  | 50.3 | MF   | 7.8      | 1062     | 493           | forest    | 2004-2017            | [3]       |
| CH-Aws | 9.8  | 46.6 | GRA  | 2.3      | 918      | 1978          | grass     | 2011, 16, 17         | [4]       |
| CH-Cha | 8.4  | 47.2 | GRA  | 9.5      | 1136     | 400           | grass     | 2006-2017            | [5]       |
| CH-Dav | 9.9  | 46.8 | ENF  | 3.5      | 1046     | 1639          | forest    | 2004-2017            | [6]       |
| CH-Fru | 8.5  | 47.1 | GRA  | 7.2      | 1651     | 982           | grass     | 2006-2017            | [4]       |
| CH-Lae | 8.4  | 47.5 | MF   | 8.7      | 1211     | 689           | forest    | 2005-2017            | [6]       |
| CH-Oe2 | 7.7  | 47.3 | CRO  | 9.8      | 1155     | 452           | crop      | 2008, 2013           | [7]       |
| CZ-BK1 | 18.5 | 49.5 | ENF  | 6.7      | 1316     | 875           | forest    | 2015-2017            | [8]       |
| CZ-Lnz | 16.9 | 48.7 | MF   | 9.3      | 550      | 150           | forest    | 2016-2017            | [9]       |
| CZ-RAJ | 16.7 | 49.4 | ENF  | 7.1      | 681      | 625           | forest    | 2013-2017            | [10]      |
| CZ-Stn | 18.0 | 49.0 | DBF  | 8.7      | 685      | 550           | forest    | 2015-2017            | [11]      |
| CZ-wet | 14.8 | 49.0 | WET  | 7.7      | 604      | 425           | peatland  | 2007-2017            | [12]      |
| DE-BER | 13.3 | 52.2 | URB  | 9.4      | 525      | 61            | grass     | 2016-2017            | [13]      |
| DE-EC2 | 8.7  | 48.9 | CRO  | 9.4      | 889      | 318           | crop      | 2011, 13, 15, 17     | [14]      |
| DE-EC4 | 9.8  | 48.5 | CRO  | 7.5      | 1064     | 687           | crop      | 2011, 14, 15         | [15]      |
| DE-Fen | 11.1 | 47.8 | GRA  | 8.4      | 1081     | 595           | grass     | 2012-2017            | [16]      |
| DE-Geb | 10.9 | 51.1 | CRO  | 8.5      | 470      | 162           | crop      | 2007, 08, 10, 14, 16 | [17]      |
| DE-Gri | 13.5 | 51.0 | GRA  | 7.8      | 901      | 385           | grass     | 2005-2017            | [18]      |
| DE-Hai | 10.5 | 51.1 | DBF  | 8.3      | 720      | 440           | forest    | 2004-2017            | [19]      |
| DE-HoH | 11.2 | 52.1 | DBF  | 9.1      | 563      | 193           | forest    | 2015-2017            | [20]      |
| DE-Hte | 12.2 | 54.2 | WET  | 9.2      | 645      | 0             | peatland  | 2016-2017            | [21]      |
| DE-Kli | 13.5 | 50.9 | CRO  | 7.6      | 842      | 478           | crop      | 2007, 2012           | [18]      |
| DE-Obe | 13.7 | 50.8 | ENF  | 5.5      | 996      | 734           | forest    | 2009-2017            | [18]      |
| DE-RbW | 11.0 | 47.7 | GRA  | 9.0      | 1160     | 769           | grass     | 2012-2017            | [16]      |
| DE-RuR | 6.3  | 50.6 | GRA  | 7.7      | 1033     | 515           | grass     | 2012-2017            | [22]      |
| DE-RuS | 6.4  | 50.9 | CRO  | 10.2     | 718      | 103           | crop      | 2013, 2015           | [23]      |
| DE-RuW | 6.3  | 50.5 | ENF  | 7.5      | 1250     | 610           | forest    | 2014-2017            | [24]      |
| DE-SfS | 11.3 | 47.8 | WET  | 8.6      | 1127     | 590           | peatland  | 2013-2017            | [25]      |
| DE-Tha | 13.6 | 51.0 | ENF  | 8.2      | 843      | 380           | forest    | 2004-2017            | [18]      |
| DE-ZRK | 12.9 | 53.9 | WET  | 8.7      | 584      | 1             | peatland  | 2016-2017            | [26]      |
| DK-Sor | 11.6 | 55.5 | DBF  | 8.2      | 660      | 40            | forest    | 2004-2017            | [27]      |
| ES-Abr | -6.8 | 38.7 | SAV  | 16       | 400      | 280           | forest    | 2016-2017            | [28]      |
| ES-LM1 | -5.8 | 39.9 | SAV  | 16       | 700      | 265           | forest    | 2016-2017            | [29]      |
| ES-LM2 | -5.8 | 39.9 | SAV  | 16       | 700      | 270           | forest    | 2016-2017            | [29]      |
| FI-Hyy | 24.3 | 61.8 | ENF  | 3.8      | 709      | 180           | forest    | 2004-2017            | [30]      |
| FI-Let | 24.0 | 60.6 | ENF  | 4.6      | 627      | 0             | forest    | 2017                 | [31]      |
| FI-Sii | 24.2 | 61.8 | WET  | 3.5      | 701      | 160           | peatland  | 2016-2017            | [32]      |
| FI-Var | 29.6 | 67.8 | ENF  | -0.5     | 601      | 395           | forest    | 2017-2017            | [33]      |
| FR-Bil | -1.0 | 44.5 | ENF  | 12.8     | 930      | 0             | forest    | 2015-2017            | [34]      |
| FR-EM2 | 3.0  | 49.9 | CRO  | 10.8     | 680      | 84            | crop      | 2015                 | [35]      |
| FR-Hes | 7.1  | 48.7 | DBF  | 9.2      | 820      | 300           | forest    | 2014-2017            | [36]      |
| IT-BCi | 15.0 | 40.5 | CRO  | 18       | 600      | 15            | crop      | 2017                 | [37]      |
| IT-Cp2 | 12.4 | 41.7 | EBF  | 15.2     | 805      | 6             | forest    | 2013-2017            | [38]      |
| IT-Lsn | 12.8 | 45.7 | OSH  | 13.1     | 1083     | 1             | crop      | 2017-2017            | [39]      |
| IT-SR2 | 10.3 | 43.7 | ENF  | 14.2     | 920      | 4             | forest    | 2014-2017            | [40]      |
| IT-Tor | 7.6  | 45.8 | GRA  | 2.9      | 920      | 2160          | grass     | 2009-2017            | [41]      |
| NL-Loo | 5.7  | 52.2 | ENF  | 9.8      | 786      | 25            | forest    | 2004-2017            | [42]      |
| RU-Fy2 | 32.9 | 56.4 | ENF  | 3.9      | 711      | 265           | forest    | 2016-2017            | [43]      |
| RU-Fyo | 32.9 | 56.5 | ENF  | 3.9      | 711      | 265           | forest    | 2016-2017            | [44]      |
| SE-Deg | 19.6 | 64.2 | WET  | 1.2      | 523      | 270           | peatland  | 2015-2017            | [45]      |
| SE-Htm | 13.4 | 56.1 | ENF  | 7.4      | 707      | 115           | forest    | 2016-2017            | [46]      |
| SE-Nor | 17.5 | 60.1 | ENF  | 5.5      | 527      | 46            | forest    | 2014-2017            | [47]      |
| SE-Ros | 19.7 | 64.2 | ENF  | 1.8      | 614      | 160           | forest    | 2015-2017            | [48]      |
| SE-Svb | 19.8 | 64.3 | ENF  | 1.8      | 614      | 270           | forest    | 2015-2016            | [49]      |

**(a) Data processing methods**

An overview of sites is given in table S1. Raw data measured at 10 or 20 s<sup>-1</sup> were processed towards half-hourly fluxes by each single site operator. Data gaps in fluxes and meteorological time series were filled, and *GPP* estimated, according to [50-55]. For sites where raw fluxes were directly provided within this study, these steps were performed by the authors, including a neighbour-based gap-filling of meteorological data between close sites [54]. For most sites, provided through the European Fluxes database cluster (<http://www.europe-fluxdata.eu/>), processing was performed by the Ecosystem Thematic Centre of ICOS RI and the intermediate result published [56]. Due to a slightly better performance on longer gaps than the marginal distribution sampling method implemented in [55], gaps in  $\lambda ET$  were filled by regression through the origin against  $ET_0$ , using an adaptive window as described in [53]. Subsequently the remaining available energy according to  $ET_0$  was used in the same way to fill gaps in  $H$ . A site was used if after these steps turbulent fluxes of sensible and latent heat and CO<sub>2</sub> as well as incoming solar radiation, air temperature, humidity and precipitation were available for at least 80% of the period April to September and at least 60% of the full year, both for 2018 and at least one year in the period from 2004 to 2017. Data of the available years from this period were averaged to serve as a reference, with an additional constraint of omitting years with incomparable land use conditions (e.g. different crops in a crop rotation, or the years before wood harvesting). Remaining gaps in final variables required as an unbiased annual budget were filled by first applying reduced major axis [57] regression between the daily time series of 2018 and the reference year and finally, if required, linear regression. Statistics that do not require gapless annual budgets, but a list of jointly available variables, such as energy balance closure EBC [58], were computed without this step after list-wise deletion of input records with missing data. In Eq. (2.2), due to varying data availability between sites, we used site-specific values of  $d$  and  $h_m$ , but a global estimate of  $1.42 \cdot 10^6 \text{ J m}^{-3} \text{ K}^{-1}$  for  $\rho_{scs}$ .  $T_c$  was in most cases approximated by  $T_a$ ;  $m_c \text{ A}^{-1}$  was either known for a site or approximated from canopy height  $h_c$  via regression on all sites with known  $h_c$  and  $m_c \text{ A}^{-1}$ . Grass reference evapotranspiration according to [59] was computed using the hourly version with solar incoming radiation ( $R_{si}$ ). The sum parameter of growing-degree days was computed by cumulatively adding all mean daily temperatures above 10°C per year.

To estimate confidence intervals of changes in fluxes and state variables across groups of sites (i.e. *affected* ecosystems or the group of all *affected* vs. all *other* sites), we considered both, the inter-annual variability between multiple reference years at each site, and the spatial variability between sites in the same group. Systematic measurement errors were not included given that they likely affect all years similarly, in line with [60], which is explicitly shown for the energy balance closure gap in the following section. Random errors in half-hourly measurements [61] strongly decrease in relative importance during propagation into annual sums [60]. For those sites and variables where estimates on annually aggregated random errors were available [56, 62], these were considerably smaller than the measured inter-annual variability, in which they are implicitly included. The mean change across a group of sites, for each of which a mean reference year was computed beforehand, is equivalent to a weighted average of differences between 2018 and each single reference year, where the weights are the inverse of the number of reference years available for the site. The corresponding confidence interval is given by

$$CI = x \pm t_{(1-\frac{\alpha}{2}, N_{eff}-1)} \sqrt{\frac{s_{ia}^2 + s_{sp}^2}{N_{eff}-1}}, \quad (\text{Eq. S1})$$

where CI is the two-sided confidence interval of the change  $x$  at error probability  $\alpha$  (0.05 for the 95% confidence),  $t$  student's t distribution,  $s_{ia}^2$  the biased (uncorrected) inter-annual variance among reference years at each site,  $s_{sp}^2$  the biased spatial variance of mean changes between the sites of the group, and the overbar denotes averaging. Note that the root term is the standard error and its product

with  $\sqrt{N_{eff}}$  the unbiased standard deviation.  $N_{eff}$  is the effective sample size of a weighted variance [63], which is in our case exactly equivalent to

$$N_{eff} = \frac{1}{\left(\frac{1}{N_{ia}}\right)} \cdot N_{sp}. \quad (\text{Eq. S2})$$

The first factor is the harmonic mean of the number of reference years available at the sites in the group, the second the number of sites. Confidence intervals not including zero indicate a significant change. Mean and relative changes, their confidence interval, and number of sites with available measurements of the respective variable are given in table S2. The same approach is used in figure S2 to estimate confidence intervals from the combined variances between days in a rolling window, reference years and sites. In this case, the number of days in the rolling window contributing to  $N_{eff}$  could lead to erroneously narrow confidence intervals due to correlation (dependence) between consecutive days. Following autocorrelation analyses of daily flux data, we thus reduced the number of days contributing to  $N_{eff}$  by a factor of four days to arrive at conservative confidence interval estimates.

Table S2: Overview of absolute and relative changes of discussed variables in 2018 vs. reference period. CI is the 95% confidence interval of the change (Eq. S1 and S2), both change and CI in units given to the left. Number of sites is  $N_{sp}$  entering Eq. S2.

|                                                   |          | <i>affected</i> | <i>affected crop</i> | <i>affected forest</i> | <i>affected grass</i> | <i>affected peat</i> | <i>other</i> |
|---------------------------------------------------|----------|-----------------|----------------------|------------------------|-----------------------|----------------------|--------------|
| $P$ (mm)                                          | change   | <b>-180</b>     | <b>-125</b>          | <b>-207</b>            | <b>-169</b>           | <b>-140</b>          | <b>+100</b>  |
|                                                   | CI       | $\pm 28$        | $\pm 74$             | $\pm 39$               | $\pm 68$              | $\pm 58$             | $\pm 83$     |
|                                                   | relative | <b>-22.9%</b>   | <b>-15.8%</b>        | <b>-27.3%</b>          | <b>-16.9%</b>         | <b>-21.4%</b>        | <b>13.6%</b> |
|                                                   | sites    | 46              | 7                    | 26                     | 7                     | 6                    | 10           |
| $ET_0$ (mm)                                       | change   | <b>+105</b>     | <b>+91</b>           | <b>+109</b>            | <b>+103</b>           | <b>+107</b>          | <b>-48</b>   |
|                                                   | CI       | $\pm 8$         | $\pm 26$             | $\pm 12$               | $\pm 15$              | $\pm 20$             | $\pm 42$     |
|                                                   | relative | <b>16.0%</b>    | <b>12.6%</b>         | <b>17.1%</b>           | <b>14.4%</b>          | <b>17.8%</b>         | <b>-4.5%</b> |
|                                                   | sites    | 46              | 7                    | 26                     | 7                     | 6                    | 10           |
| $T_{air}$ (°C)                                    | change   | <b>+0.82</b>    | <b>+0.92</b>         | <b>+0.80</b>           | <b>+0.93</b>          | <b>+0.66</b>         | +0.05        |
|                                                   | CI       | $\pm 0.13$      | $\pm 0.43$           | $\pm 0.17$             | $\pm 0.17$            | $\pm 0.55$           | $\pm 0.32$   |
|                                                   | sites    | 46              | 7                    | 26                     | 7                     | 6                    | 10           |
| $R_g$ (MJ m <sup>-2</sup> yr <sup>-1</sup> )      | change   | <b>+360</b>     | <b>+307</b>          | <b>+357</b>            | <b>+353</b>           | <b>+442</b>          | <b>-147</b>  |
|                                                   | CI       | $\pm 32$        | $\pm 84$             | $\pm 45$               | $\pm 51$              | $\pm 96$             | $\pm 95$     |
|                                                   | relative | <b>9.2%</b>     | <b>7.4%</b>          | <b>9.5%</b>            | <b>8.3%</b>           | <b>11.9%</b>         | <b>-2.7%</b> |
|                                                   | sites    | 46              | 7                    | 26                     | 7                     | 6                    | 10           |
| $SW_{out}$ (MJ m <sup>-2</sup> yr <sup>-1</sup> ) | change   | <b>+69</b>      | +32                  | <b>+49</b>             | <b>+103</b>           | <b>+148</b>          | -29          |
|                                                   | CI       | $\pm 21$        | $\pm 62$             | $\pm 15$               | $\pm 63$              | $\pm 123$            | $\pm 67$     |
|                                                   | relative | <b>11.5%</b>    | 4.0%                 | <b>11.8%</b>           | <b>10.5%</b>          | <b>25.3%</b>         | -2.6%        |
|                                                   | sites    | 35              | 5                    | 20                     | 5                     | 5                    | 7            |
| albedo                                            | change   | +0.004          | -0.007               | +0.002                 | +0.003                | +0.020               | +0.001       |
|                                                   | CI       | $\pm 0.005$     | $\pm 0.014$          | $\pm 0.004$            | $\pm 0.015$           | $\pm 0.026$          | $\pm 0.014$  |
|                                                   | relative | 2.3%            | -3.4%                | 2.0%                   | 1.2%                  | 12.1%                | 0.2%         |
|                                                   | sites    | 35              | 5                    | 20                     | 5                     | 5                    | 7            |
| $LW_{in}$ (MJ m <sup>-2</sup> yr <sup>-1</sup> )  | change   | +24             | <b>+87</b>           | +32                    | -29                   | -17                  | <b>+155</b>  |
|                                                   | CI       | $\pm 30$        | $\pm 77$             | $\pm 37$               | $\pm 52$              | $\pm 148$            | $\pm 73$     |
|                                                   | relative | 0.2%            | 0.9%                 | 0.3%                   | -0.3%                 | -0.2%                | 1.6%         |
|                                                   | sites    | 44              | 6                    | 26                     | 7                     | 5                    | 10           |
| $LW_{out}$ (MJ m <sup>-2</sup> yr <sup>-1</sup> ) | change   | <b>+148</b>     | <b>+227</b>          | <b>+153</b>            | <b>+169</b>           | +33                  | -6           |
|                                                   | CI       | $\pm 29$        | $\pm 85$             | $\pm 25$               | $\pm 48$              | $\pm 204$            | $\pm 106$    |
|                                                   | relative | <b>1.3%</b>     | <b>2.0%</b>          | <b>1.4%</b>            | <b>1.5%</b>           | 0.3%                 | 0.0%         |
|                                                   | sites    | 35              | 5                    | 20                     | 5                     | 5                    | 6            |
| $R_n$ (MJ m <sup>-2</sup> yr <sup>-1</sup> )      | change   | <b>+123</b>     | <b>+141</b>          | +98                    | <b>+140</b>           | <b>+177</b>          | +16          |
|                                                   | CI       | $\pm 60$        | $\pm 87$             | $\pm 100$              | $\pm 80$              | $\pm 126$            | $\pm 53$     |
|                                                   | relative | <b>6.3%</b>     | <b>7.8%</b>          | 4.7%                   | <b>7.9%</b>           | <b>9.6%</b>          | 0.6%         |
|                                                   | sites    | 36              | 5                    | 20                     | 5                     | 6                    | 7            |

Table S2 continued

|                                                     |          | <i>affected</i> | <i>affected</i><br><b>crop</b> | <i>affected</i><br><b>forest</b> | <i>affected</i><br><b>grass</b> | <i>affected</i><br><b>peat</b> | <i>other</i>  |
|-----------------------------------------------------|----------|-----------------|--------------------------------|----------------------------------|---------------------------------|--------------------------------|---------------|
| EBC (filled)                                        | change   | <b>+0.02</b>    | -0.02                          | <b>+0.04</b>                     | +0.00                           | +0.04                          | +0.04         |
|                                                     | CI       | $\pm 0.02$      | $\pm 0.05$                     | $\pm 0.03$                       | $\pm 0.03$                      | $\pm 0.07$                     | $\pm 0.13$    |
|                                                     | relative | <b>3.0%</b>     | -2.7%                          | <b>4.9%</b>                      | -0.6%                           | 5.2%                           | 4.9%          |
|                                                     | sites    | 45              | 7                              | 25                               | 7                               | 6                              | 9             |
| $H$ (MJ m <sup>-2</sup> yr <sup>-1</sup> )          | change   | <b>+169</b>     | <b>+135</b>                    | <b>+235</b>                      | <b>+79</b>                      | +30                            | -34           |
|                                                     | CI       | $\pm 36$        | $\pm 97$                       | $\pm 52$                         | $\pm 33$                        | $\pm 58$                       | $\pm 120$     |
|                                                     | relative | <b>32.3%</b>    | <b>43.5%</b>                   | <b>34.2%</b>                     | <b>28.9%</b>                    | 8.2%                           | -3.2%         |
|                                                     | sites    | 46              | 7                              | 26                               | 7                               | 6                              | 10            |
| $\lambda ET$ (MJ m <sup>-2</sup> yr <sup>-1</sup> ) | change   | 0               | <b>-122</b>                    | -29                              | +54                             | <b>+205</b>                    | -9            |
|                                                     | CI       | $\pm 39$        | $\pm 118$                      | $\pm 49$                         | $\pm 68$                        | $\pm 94$                       | $\pm 123$     |
|                                                     | relative | 0.0%            | <b>-10.2%</b>                  | -2.8%                            | 4.4%                            | <b>20.8%</b>                   | -0.7%         |
|                                                     | sites    | 46              | 7                              | 26                               | 7                               | 6                              | 10            |
| $\lambda ET (H+\lambda ET)^{-1}$                    | change   | <b>-0.07</b>    | <b>-0.10</b>                   | <b>-0.09</b>                     | <b>-0.05</b>                    | +0.03                          | +0.03         |
|                                                     | CI       | $\pm 0.02$      | $\pm 0.08$                     | $\pm 0.03$                       | $\pm 0.04$                      | $\pm 0.05$                     | $\pm 0.04$    |
|                                                     | relative | <b>-10.5%</b>   | <b>-12.4%</b>                  | <b>-14.5%</b>                    | <b>-5.8%</b>                    | 3.3%                           | 5.3%          |
|                                                     | sites    | 44              | 7                              | 26                               | 6                               | 5                              | 10            |
| $S_l$ (MJ m <sup>-2</sup> yr <sup>-1</sup> )        | change   | <b>+9.3</b>     | <b>+33.4</b>                   | <b>+4.8</b>                      | <b>+17.0</b>                    | -7.8                           | -6.8          |
|                                                     | CI       | $\pm 4.6$       | $\pm 26.1$                     | $\pm 2.6$                        | $\pm 9.6$                       | $\pm 13.5$                     | $\pm 17.3$    |
|                                                     | relative | <b>299.2%</b>   | <b>1384.2%</b>                 | <b>256.8%</b>                    | <b>110.4%</b>                   | -156.9%                        | -63.8%        |
|                                                     | sites    | 46              | 7                              | 26                               | 7                               | 6                              | 10            |
| $E_c$ (MJ m <sup>-2</sup> yr <sup>-1</sup> )        | change   | <b>-1.6</b>     | -2.1                           | -1.0                             | <b>-2.9</b>                     | -2.1                           | +0.4          |
|                                                     | CI       | $\pm 1.1$       | $\pm 5.2$                      | $\pm 1.4$                        | $\pm 1.9$                       | $\pm 2.9$                      | $\pm 3.1$     |
|                                                     | relative | <b>-17.8%</b>   | -32.4%                         | -8.3%                            | <b>-44.0%</b>                   | -74.9%                         | 7.5%          |
|                                                     | sites    | 46              | 7                              | 26                               | 7                               | 6                              | 10            |
| IWUE* (gC hPa kg <sup>-1</sup> H <sub>2</sub> O)    | change   | <b>+3.1</b>     | <b>+2.8</b>                    | <b>+3.8</b>                      | <b>+2.5</b>                     | <b>+1.0</b>                    | +0.1          |
|                                                     | CI       | $\pm 0.5$       | $\pm 1.0$                      | $\pm 0.7$                        | $\pm 0.9$                       | $\pm 0.7$                      | $\pm 1.5$     |
|                                                     | relative | <b>31.4%</b>    | <b>32.6%</b>                   | <b>35.3%</b>                     | <b>20.7%</b>                    | <b>21.2%</b>                   | 0.4%          |
|                                                     | sites    | 45              | 6                              | 26                               | 7                               | 6                              | 10            |
| WUE <sub>eco</sub>                                  | change   | <b>-0.0011</b>  | -0.0015                        | -0.0002                          | <b>-0.0027</b>                  | -0.0023                        | +0.0004       |
|                                                     | CI       | $\pm 0.0009$    | $\pm 0.0043$                   | $\pm 0.0012$                     | $\pm 0.0013$                    | $\pm 0.0026$                   | $\pm 0.0021$  |
|                                                     | relative | <b>-13.8%</b>   | -27.7%                         | -2.3%                            | <b>-48.7%</b>                   | -88.5%                         | 9.0%          |
|                                                     | sites    | 46              | 7                              | 26                               | 7                               | 6                              | 10            |
| $swc$ (cm <sup>3</sup> cm <sup>-3</sup> )           | change   | <b>-0.051</b>   | <b>-0.057</b>                  | <b>-0.044</b>                    | <b>-0.073</b>                   | <b>-0.038</b>                  | <b>+0.032</b> |
|                                                     | CI       | $\pm 0.010$     | $\pm 0.049$                    | $\pm 0.014$                      | $\pm 0.011$                     | $\pm 0.034$                    | $\pm 0.028$   |
|                                                     | relative | <b>-16.2%</b>   | <b>-19.8%</b>                  | <b>-17.0%</b>                    | <b>-18.6%</b>                   | <b>-5.5%</b>                   | <b>15.5%</b>  |
|                                                     | sites    | 33              | 5                              | 20                               | 6                               | 2                              | 9             |

**(b) Energy balance closure**

Eddy-Covariance measurements are known for a gap in the energy balance closure (EBC): the sum of  $H$  and  $\lambda ET$  is frequently about 15 to 30% smaller than  $R_n - S_l - E_c$  [58, 64]. Current theory suggests a number of different reasons including underestimation of the turbulent heat fluxes due to surface heterogeneity or incomplete correction of spectral losses, or unaccounted energy storage [64-68]. However, there is no consensus yet on the application of a correction, its distribution between  $H$  and  $\lambda ET$  and its implications for  $E_c$  [69, 70]. However, relative changes in turbulent fluxes between years remain unaffected as long as EBC does not change systematically between respective years. Figure S1 demonstrates there was little average change in EBC, with a closure gap around 20% both in the reference period and in 2018. EBC slightly improved during the drought, although both increase and decrease were found for individual sites.

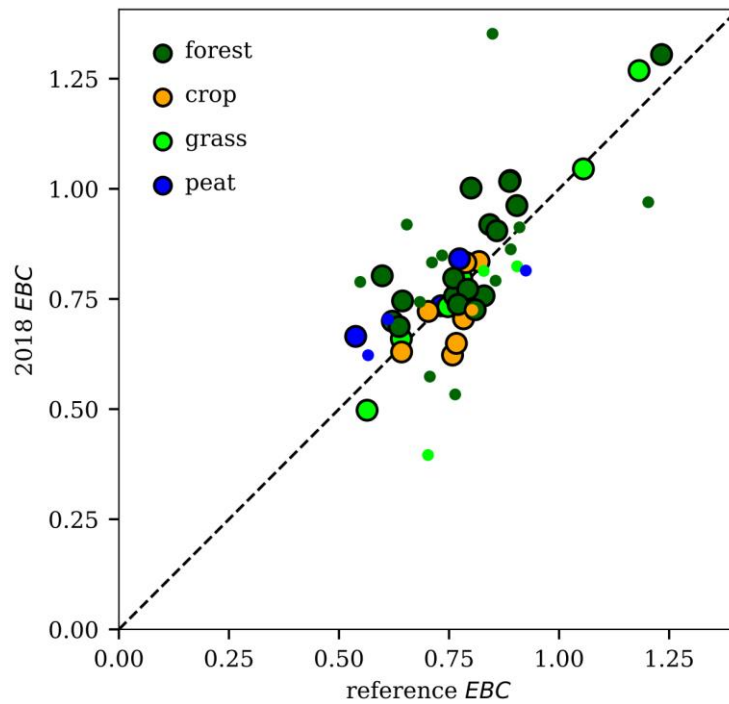

Figure S1: Energy balance closure (EBC), i.e., annual cumulative  $(H+\lambda ET)(R_n-S_l-E_c)^{-1}$ , compared between 2018 and the reference period for each site. Large symbols indicate sites where measurements of these variables were jointly available during both periods, small symbols indicate sites where  $R_n-S_l$  was estimated from gap-filled short-wave incoming radiation according to [59]. Mean EBC across sites changed from 0.77 (reference) to 0.81 (2018) for the high-quality and from 0.77 to 0.80 for the filled records.

### (c) Intra-annual temporal dynamics of $ET$

On average, grassland sites showed higher evapotranspiration losses compared to the reference period in the early stages of the drought, and lower ones later presumably caused by soil water depletion. As a result, sensible heat fluxes were particularly high compared to the reference period during late stages of the drought (figure S2). Forests showed less extreme relative changes, in accordance with [71]. However, it should also be noted that on average forests showed higher sensible heat fluxes than grasslands both during the reference period and 2018, partly because of having a lower albedo. Any mitigation strategy by land use change would need to carefully consider this drawback effect. Cropland sites showed an even stronger tendency of evapotranspiration to decline during later stages of the drought. Inspection of a single cropland site demonstrates that this effect is at least partly due to earlier maturity and harvest, and strongly reduced evaporation from the dry topsoil after harvest (figure S2).

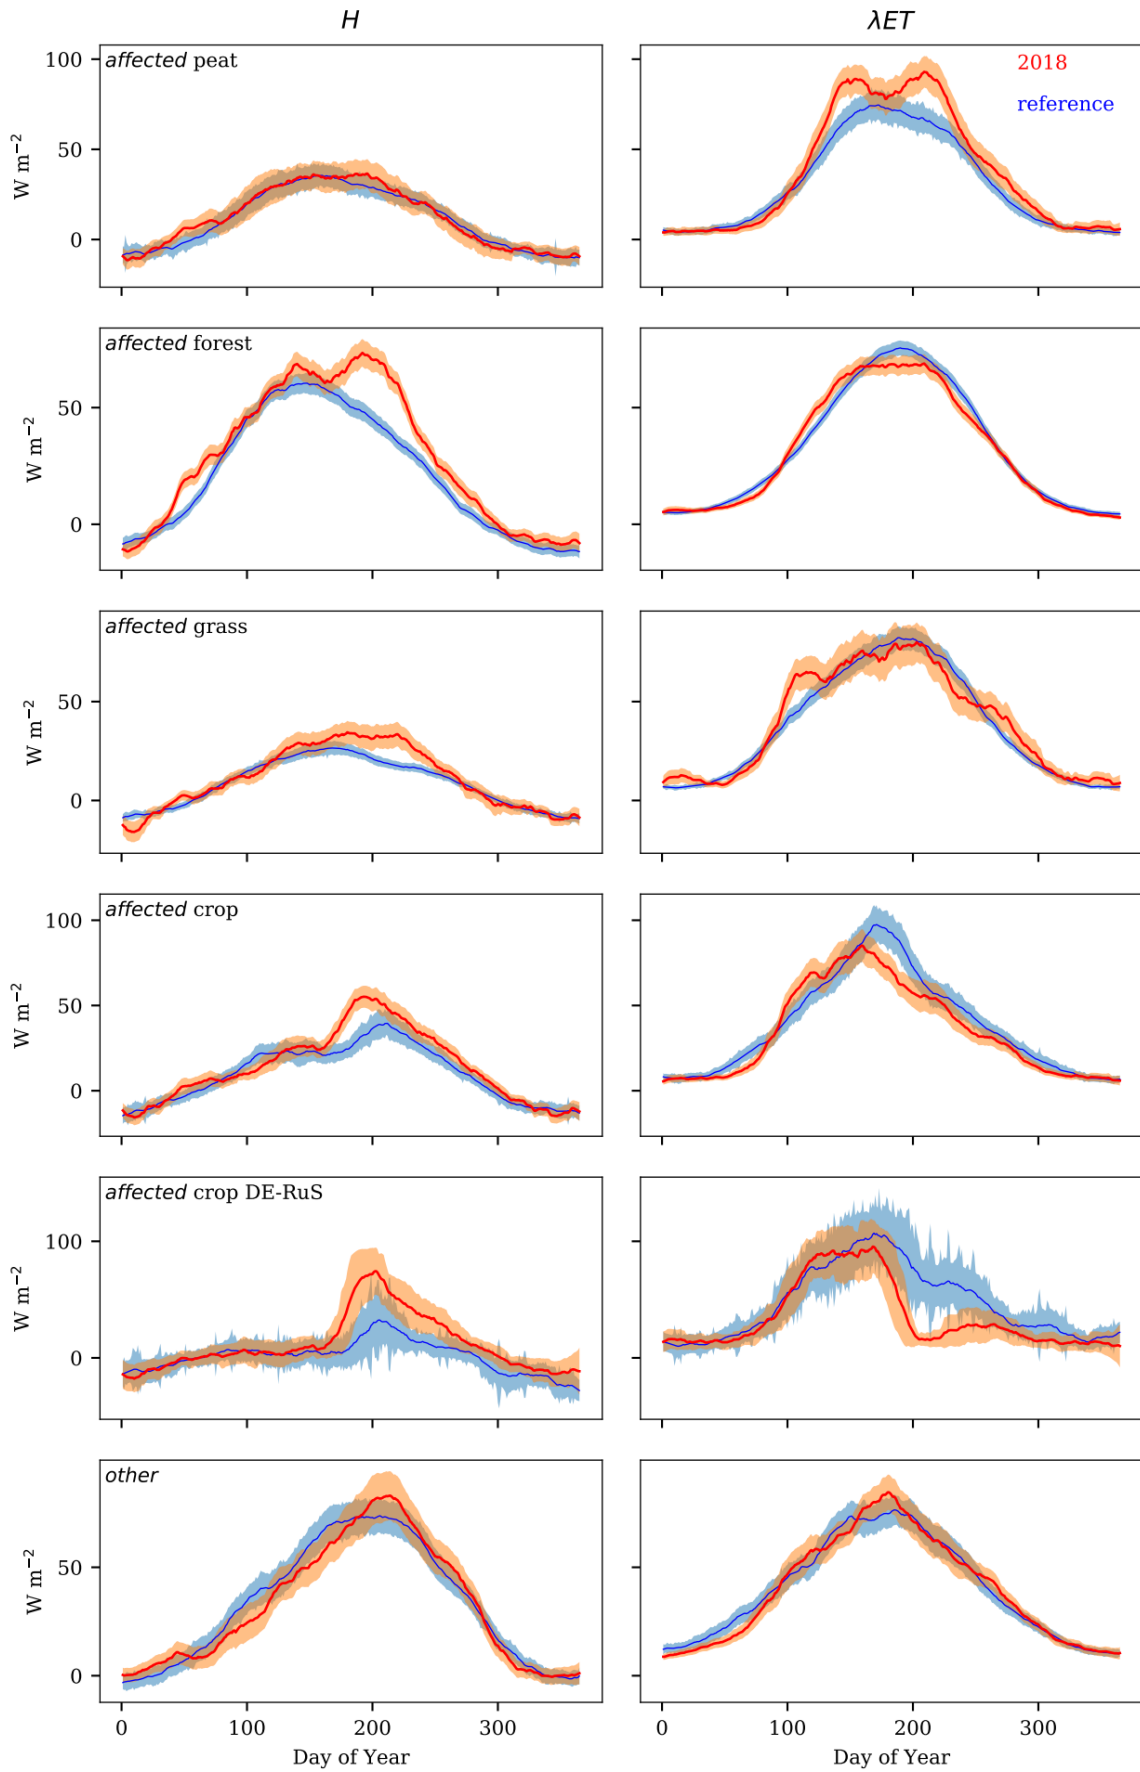

Figure S2: Annual course of sensible ( $H$ , left column) and latent heat flux ( $\lambda ET$ , right column,  $W m^{-2}$ ) averaged across groups of ecosystems as a 30-day rolling average during 2018 (red) and the reference period (blue). Shaded areas indicate the 95% confidence interval estimated from variability within the 30-day rolling window, between reference years and between sites (see supplementary material (a)). Harvest of winter wheat at DE-RuS took place at Day of Year 197 in 2018, while in the two reference years it took place at Day 223 and 215, respectively.

## References

- [1] Gielen B, De Vos B, Campioli M, Neiryneck J, Papale D, Verstraeten A, Ceulemans R, Janssens IA. 2013 Biometric and eddy covariance-based assessment of decadal carbon sequestration of a temperate Scots pine forest. *Agric. For. Meteorol.* **174**, 135-143. (DOI:10.1016/j.agrformet.2013.02.008).
- [2] Buysse P, Bodson B, Debacq A, De Ligne A, Heinesch B, Manise T, Moureaux C, Aubinet M. 2017 Carbon budget measurement over 12 years at a crop production site in the silty-loam region in Belgium. *Agric. For. Meteorol.* **246**, 241-255. (DOI:10.1016/j.agrformet.2017.07.004).
- [3] Aubinet M, Hurdebise Q, Chopin H, Debacq A, De Ligne A, Heinesch B, Manise T, Vincke C. 2018 Inter-annual variability of Net Ecosystem Productivity for a temperate mixed forest: A predominance of carry-over effects? *Agric. For. Meteorol.* **262**, 340-353. (DOI:10.1016/j.agrformet.2018.07.024).
- [4] Zeeman MJ, Hiller R, Gilgen AK, Michna P, Pluss P, Buchmann N, Eugster W. 2010 Management and climate impacts on net CO<sub>2</sub> fluxes and carbon budgets of three grasslands along an elevational gradient in Switzerland. *Agric. For. Meteorol.* **150**, 519-530. (DOI:10.1016/j.agrformet.2010.01.011).
- [5] Hortnagl L, Barthel M, Buchmann N, Eugster W, Butterbach-Bahl K, Diaz-Pines E, Zeeman M, Klumpp K, Kiese R, Bahn M, et al. 2018 Greenhouse gas fluxes over managed grasslands in Central Europe. *Global Change Biology* **24**, 1843-1872. (DOI:10.1111/gcb.14079).
- [6] Haeni M, Zweifel R, Eugster W, Gessler A, Zielis S, Bernhofer C, Carrara A, Grunwald T, Havrankova K, Heinesch B, et al. 2017 Winter respiratory C losses provide explanatory power for net ecosystem productivity. *J. Geophys. Res.-Biogeosci.* **122**, 243-260. (DOI:10.1002/2016jg003455).
- [7] Emmel C, Winkler A, Hortnagl L, Revill A, Ammann C, D'Odorico P, Buchmann N, Eugster W. 2018 Integrated management of a Swiss cropland is not sufficient to preserve its soil carbon pool in the long term. *Biogeosciences* **15**, 5377-5393. (DOI:10.5194/bg-15-5377-2018).
- [8] Krupkova L, Markova I, Havrankova K, Pokorny R, Urban O, Sigut L, Pavelka M, Cienciala E, Marek MV. 2017 Comparison of different approaches of radiation use efficiency of biomass formation estimation in Mountain Norway spruce. *Trees-Struct. Funct.* **31**, 325-337. (DOI:10.1007/s00468-016-1486-2).
- [9] Acosta M, Darenova E, Dusek J, Pavelka M. 2017 Soil carbon dioxide fluxes in a mixed floodplain forest in the Czech Republic. *Eur. J. Soil Biol.* **82**, 35-42. (DOI:10.1016/j.ejsobi.2017.08.006).
- [10] McGloin R, Sigut L, Havrankova K, Dusek J, Pavelka M, Sedlak P. 2018 Energy balance closure at a variety of ecosystems in Central Europe with contrasting topographies. *Agric. For. Meteorol.* **248**, 418-431. (DOI:10.1016/j.agrformet.2017.10.003).
- [11] Krupkova L, Havrankova K, Krejza J, Sedlak P, Marek MV. 2019 Impact of water scarcity on spruce and beech forests. *J. For. Res.* **30**, 899-909. (DOI:10.1007/s11676-018-0642-5).
- [12] Dusek J, Cizkova H, Stellner S, Czerny R, Kvet J. 2012 Fluctuating water table affects gross ecosystem production and gross radiation use efficiency in a sedge-grass marsh. *Hydrobiologia* **692**, 57-66. (DOI:10.1007/s10750-012-0998-z).
- [13] Heusinger J, Weber S. 2017 Surface energy balance of an extensive green roof as quantified by full year eddy-covariance measurements. *Sci. Total Environ.* **577**, 220-230. (DOI:10.1016/j.scitotenv.2016.10.168).
- [14] Poyda A, Wizemann HD, Ingwersen J, Eshonkulov R, Hogy P, Demyan MS, Kremer P, Wulfmeyer V, Streck T. 2019 Carbon fluxes and budgets of intensive crop rotations in two regional climates of southwest Germany. *Agriculture Ecosystems & Environment* **276**, 31-46. (DOI:10.1016/j.agee.2019.02.011).
- [15] Wizemann HD, Ingwersen J, Hogy P, Warrach-Sagi K, Streck T, Wulfmeyer V. 2015 Three year observations of water vapor and energy fluxes over agricultural crops in two regional climates of Southwest Germany. *Meteorologische Zeitschrift* **24**, 39-59. (DOI:10.1127/metz/2014/0618).
- [16] Kiese R, Fersch B, Baessler C, Brosy C, Butterbach-Bahl K, Chwala C, Dannenmann M, Fu J, Gasche R, Grote R, et al. 2018 The TERENO Pre-Alpine Observatory: Integrating Meteorological, Hydrological, and Biogeochemical Measurements and Modeling. *Vadose Zone Journal* **17**, 17. (DOI:10.2136/vzj2018.03.0060).
- [17] Anthoni PM, Freibauer A, Kolle O, Schulze ED. 2004 Winter wheat carbon exchange in Thuringia, Germany. *Agric. For. Meteorol.* **121**, 55-67. (DOI:10.1016/s0168-1923(03)00162-x).
- [18] Prescher AK, Grunwald T, Bernhofer C. 2010 Land use regulates carbon budgets in eastern Germany: From NEE to NBP. *Agric. For. Meteorol.* **150**, 1016-1025. (DOI:10.1016/j.agrformet.2010.03.008).
- [19] Knohl A, Schulze ED, Kolle O, Buchmann N. 2003 Large carbon uptake by an unmanaged 250-year-old deciduous forest in Central Germany. *Agric. For. Meteorol.* **118**, 151-167. (DOI:10.1016/s0168-1923(03)00115-1).
- [20] Wollschlager U, Attinger S, Borchardt D, Brauns M, Cuntz M, Dietrich P, Fleckenstein JH, Friese K, Friesen J, Harpke A, et al. 2017 The Bode hydrological observatory: a platform for integrated, interdisciplinary hydro-ecological research within the TERENO Harz/Central German Lowland Observatory. *Environ. Earth Sci.* **76**, 25. (DOI:10.1007/s12665-016-6327-5).
- [21] Koebsch F, Glatzel S, Hofmann J, Forbrich I, Jurasinski G. 2013 CO<sub>2</sub> exchange of a temperate fen during the conversion from moderately rewetting to flooding. *J. Geophys. Res.-Biogeosci.* **118**, 940-950. (DOI:10.1002/jgrg.20069).
- [22] Post H, Franssen HJH, Graf A, Schmidt M, Vereecken H. 2015 Uncertainty analysis of eddy covariance CO<sub>2</sub> flux measurements for different EC tower distances using an extended two-tower approach. *Biogeosciences* **12**, 1205-1221. (DOI:10.5194/bg-12-1205-2015).
- [23] Klosterhalfen A, Moene AF, Schmidt M, Scanlon TM, Vereecken H, Graf A. 2019 Sensitivity analysis of a source partitioning method for H<sub>2</sub>O and CO<sub>2</sub> fluxes based on high frequency eddy covariance data: Findings from field data and large eddy simulations. *Agric. For. Meteorol.* **265**, 152-170. (DOI:10.1016/j.agrformet.2018.11.003).

- [24] Ney P, Graf A, Bogena H, Diekkrüger B, Drüe C, Esser O, Heinemann G, Klosterhalfen A, Pick K, Pütz T, et al. 2019 CO<sub>2</sub> fluxes before and after partial deforestation of a Central European spruce forest. *Agric. For. Meteorol.* **274**, 61-74. (DOI:10.1016/j.agrformet.2019.04.009).
- [25] Hommeltenberg J, Schmid HP, Drosler M, Werle P. 2014 Can a bog drained for forestry be a stronger carbon sink than a natural bog forest? *Biogeosciences* **11**, 3477-3493. (DOI:10.5194/bg-11-3477-2014).
- [26] Franz D, Koebisch F, Larmanou E, Augustin J, Sachs T. 2016 High net CO<sub>2</sub> and CH<sub>4</sub> release at a eutrophic shallow lake on a formerly drained fen. *Biogeosciences* **13**, 3051-3070. (DOI:10.5194/bg-13-3051-2016).
- [27] Wu J, Larsen KS, van der Linden L, Beier C, Pilegaard K, Ibrom A. 2013 Synthesis on the carbon budget and cycling in a Danish, temperate deciduous forest. *Agric. For. Meteorol.* **181**, 94-107. (DOI:10.1016/j.agrformet.2013.07.012).
- [28] Luo YP, El-Madany TS, Filippa G, Ma XL, Ahrens B, Carrara A, Gonzalez-Cascon R, Cremonese E, Galvagno M, Hammer TW, et al. 2018 Using Near-Infrared-Enabled Digital Repeat Photography to Track Structural and Physiological Phenology in Mediterranean Tree-Grass Ecosystems. *Remote Sens.* **10**, 32. (DOI:10.3390/rs10081293).
- [29] El-Madany TS, Reichstein M, Perez-Priego O, Carrara A, Moreno G, Martin MP, Pacheco-Labrador J, Wohlfahrt G, Nieto H, Weber U, et al. 2018 Drivers of spatio-temporal variability of carbon dioxide and energy fluxes in a Mediterranean savanna ecosystem. *Agric. For. Meteorol.* **262**, 258-278. (DOI:10.1016/j.agrformet.2018.07.010).
- [30] Mammarella I, Launiainen S, Gronholm T, Keronen P, Pumpanen J, Rannik U, Vesala T. 2009 Relative Humidity Effect on the High-Frequency Attenuation of Water Vapor Flux Measured by a Closed-Path Eddy Covariance System. *Journal of Atmospheric and Oceanic Technology* **26**, 1856-1866. (DOI:10.1175/2009jtecha1179.1).
- [31] Launiainen S, Katul GG, Kolari P, Lindroth A, Lohila A, Aurela M, Varlagin A, Grelle A, Vesala T. 2016 Do the energy fluxes and surface conductance of boreal coniferous forests in Europe scale with leaf area? *Global Change Biology* **22**, 4096-4113. (DOI:10.1111/gcb.13497).
- [32] Rinne J, Tuittila ES, Peltola O, Li XF, Raivonen M, Alekseychik P, Haapanala S, Pihlatie M, Aurela M, Mammarella I, et al. 2018 Temporal Variation of Ecosystem Scale Methane Emission From a Boreal Fen in Relation to Temperature, Water Table Position, and Carbon Dioxide Fluxes. *Global Biogeochemical Cycles* **32**, 1087-1106. (DOI:10.1029/2017gb005747).
- [33] Kulmala L, Pumpanen J, Kolari P, Dengel S, Berninger F, Koster K, Matkala L, Vanhatalo A, Vesala T, Back J. 2019 Inter- and intra-annual dynamics of photosynthesis differ between forest floor vegetation and tree canopy in a subarctic Scots pine stand. *Agric. For. Meteorol.* **271**, 1-11. (DOI:10.1016/j.agrformet.2019.02.029).
- [34] Moreaux V, Lamaud E, Bosc A, Bonnefond JM, Medlyn BE, Loustau D. 2011 Paired comparison of water, energy and carbon exchanges over two young maritime pine stands (*Pinus pinaster* Ait.): effects of thinning and weeding in the early stage of tree growth. *Tree Physiology* **31**, 903-921. (DOI:10.1093/treephys/tpr048).
- [35] Domeignoz-Horta LA, Spor A, Bru D, Breuil MC, Bizouard F, Leonard J, Philippot L. 2015 The diversity of the N<sub>2</sub>O reducers matters for the N<sub>2</sub>O:N<sub>2</sub> denitrification end-product ratio across an annual and a perennial cropping system. *Front. Microbiol.* **6**, 10. (DOI:10.3389/fmicb.2015.00971).
- [36] Granier A, Breda N, Longdoz B, Gross P, Ngao J. 2008 Ten years of fluxes and stand growth in a young beech forest at Hesse, North-eastern France. *Annals of Forest Science* **65**, 13. (DOI:10.1051/forest:2008052).
- [37] Vitale L, Di Tommasi P, Arena C, Riondino M, Forte A, Verlotta A, Fierro A, De Santo AV, Fuggi A, Magliulo V. 2009 Growth and gas exchange response to water shortage of a maize crop on different soil types. *Acta Physiol. Plant.* **31**, 331-341. (DOI:10.1007/s11738-008-0239-2).
- [38] Fares S, Savi F, Muller J, Matteucci G, Paoletti E. 2014 Simultaneous measurements of above and below canopy ozone fluxes help partitioning ozone deposition between its various sinks in a Mediterranean Oak Forest. *Agric. For. Meteorol.* **198**, 181-191. (DOI:10.1016/j.agrformet.2014.08.014).
- [39] Tezza L, Vendrame N, Pitacco A. 2019 Disentangling the carbon budget of a vineyard: The role of soil management. *Agriculture Ecosystems & Environment* **272**, 52-62. (DOI:10.1016/j.agee.2018.11.002).
- [40] Hoshika Y, Fares S, Savi F, Gruening C, Goded I, De Marco A, Sicard P, Paoletti E. 2017 Stomatal conductance models for ozone risk assessment at canopy level in two Mediterranean evergreen forests. *Agric. For. Meteorol.* **234**, 212-221. (DOI:10.1016/j.agrformet.2017.01.005).
- [41] Galvagno M, Wohlfahrt G, Cremonese E, Rossini M, Colombo R, Filippa G, Julitta T, Manca G, Siniscalco C, di Cella UM, et al. 2013 Phenology and carbon dioxide source/sink strength of a subalpine grassland in response to an exceptionally short snow season. *Environ. Res. Lett.* **8**, 10. (DOI:10.1088/1748-9326/8/2/025008).
- [42] Elbers JA, Jacobs CMJ, Kruijt B, Jans WWP, Moors EJ. 2011 Assessing the uncertainty of estimated annual totals of net ecosystem productivity: A practical approach applied to a mid latitude temperate pine forest. *Agric. For. Meteorol.* **151**, 1823-1830. (DOI:10.1016/j.agrformet.2011.07.020).
- [43] Mamkin V, Kurbatova J, Avilov V, Ivanov D, Kuricheva O, Varlagin A, Yaseneva I, Olchev A. 2019 Energy and CO<sub>2</sub> exchange in an undisturbed spruce forest and clear-cut in the Southern Taiga. *Agric. For. Meteorol.* **265**, 252-268. (DOI:10.1016/j.agrformet.2018.11.018).
- [44] Kurbatova J, Tatarinov F, Molchanov A, Varlagin A, Avilov V, Kozlov D, Ivanov D, Valentini R. 2013 Partitioning of ecosystem respiration in a paludified shallow-peat spruce forest in the southern taiga of European Russia. *Environ. Res. Lett.* **8**, 9. (DOI:10.1088/1748-9326/8/4/045028).
- [45] Nilsson M, Sagerfors J, Buffam I, Laudon H, Eriksson T, Grelle A, Klemetsson L, Weslien P, Lindroth A. 2008 Contemporary carbon accumulation in a boreal oligotrophic minerogenic mire - a significant sink after accounting for all C-fluxes. *Global Change Biology* **14**, 2317-2332. (DOI:10.1111/j.1365-2486.2008.01654.x).
- [46] van Meeningen Y, Wang M, Karlsson T, Seifert A, Schurgers G, Rinnan R, Hoist T. 2017 Isoprenoid emission variation of Norway spruce across a European latitudinal transect. *Atmospheric Environment* **170**, 45-57. (DOI:10.1016/j.atmosenv.2017.09.045).



- [47] Lindroth A, Holst J, Heliasz M, Vestin P, Lagergren F, Biermann T, Cai ZZ, Molder M. 2018 Effects of low thinning on carbon dioxide fluxes in a mixed hemiboreal forest. *Agric. For. Meteorol.* **262**, 59-70. (DOI:10.1016/j.agrformet.2018.06.021).
- [48] Jocher G, Marshall J, Nilsson MB, Linder S, De Simon G, Hornlund T, Lundmark T, Nasholm T, Lofvenius MO, Tarvainen L, et al. 2018 Impact of Canopy Decoupling and Subcanopy Advection on the Annual Carbon Balance of a Boreal Scots Pine Forest as Derived From Eddy Covariance. *J. Geophys. Res.-Biogeosci.* **123**, 303-325. (DOI:10.1002/2017jg003988).
- [49] Chi JS, Nilsson MB, Kljun N, Wallerman J, Fransson JES, Laudon H, Lundmark T, Peichl M. 2019 The carbon balance of a managed boreal landscape measured from a tall tower in northern Sweden. *Agric. For. Meteorol.* **274**, 29-41. (DOI:10.1016/j.agrformet.2019.04.010).
- [50] Reichstein M, Falge E, Baldocchi D, Papale D, Aubinet M, Berbigier P, Bernhofer C, Buchmann N, Gilmanov T, Granier A, et al. 2005 On the separation of net ecosystem exchange into assimilation and ecosystem respiration: review and improved algorithm. *Global Change Biology* **11**, 1424-1439. (DOI:10.1111/j.1365-2486.2005.001002.x).
- [51] Papale D, Reichstein M, Aubinet M, Canfora E, Bernhofer C, Kutsch W, Longdoz B, Rambal S, Valentini R, Vesala T, et al. 2006 Towards a standardized processing of Net Ecosystem Exchange measured with eddy covariance technique: algorithms and uncertainty estimation. *Biogeosciences* **3**, 571-583. (DOI:10.5194/bg-3-571-2006).
- [52] Lasslop G, Reichstein M, Papale D, Richardson AD, Arneth A, Barr A, Stoy P, Wohlfahrt G. 2010 Separation of net ecosystem exchange into assimilation and respiration using a light response curve approach: critical issues and global evaluation. *Global Change Biology* **16**, 187-208. (DOI:10.1111/j.1365-2486.2009.02041.x).
- [53] Graf A, Bogena HR, Drüe C, Hardelauf H, Pütz T, Heinemann G, Vereecken H. 2014 Spatiotemporal relations between water budget components and soil water content in a forested tributary catchment. *Water Resources Research* **50**, 4837-4857. (DOI:10.1002/2013wr014516).
- [54] Graf A. 2017 Gap-filling meteorological variables with Empirical Orthogonal Functions. In *EGU 2017 General Assembly* (23 Apr 2017 - 28 Apr 2017, Vienna (Austria)).
- [55] Wutzler T, Lucas-Moffat A, Migliavacca M, Knauer J, Sickel K, Sigut L, Menzer O, Reichstein M. 2018 Basic and extensible post-processing of eddy covariance flux data with REdDyProc. *Biogeosciences* **15**, 5015-5030. (DOI:10.5194/bg-15-5015-2018).
- [56] Drought 2018 Team and ICOS Ecosystem Thematic Centre. 2020 Drought-2018 ecosystem eddy covariance flux product for 52 stations in FLUXNET-Archive format (DOI:10.18160/YVR0-4898)
- [57] Webster R. 1997 Regression and functional relations. *European Journal of Soil Science* **48**, 557-566.
- [58] Wilson K, Goldstein A, Falge E, Aubinet M, Baldocchi D, Berbigier P, Bernhofer C, Ceulemans R, Dolman H, Field C, et al. 2002 Energy balance closure at FLUXNET sites. *Agric. For. Meteorol.* **113**, 223-243. (DOI:10.1016/s0168-1923(02)00109-0).
- [59] Allen RG, Pereira LS, Raes D, Smith M. 1998 *Crop evapotranspiration: Guidelines for computing crop water requirements*. Rome, FAO; 300 p.
- [60] Ciais P, Reichstein M, Viovy N, Granier A, Ogee J, Allard V, Aubinet M, Buchmann N, Bernhofer C, Carrara A, et al. 2005 Europe-wide reduction in primary productivity caused by the heat and drought in 2003. *Nature* **437**, 529-533.
- [61] Finkelstein PL, Sims PF. 2001 Sampling error in eddy correlation flux measurements. *Journal of Geophysical Research-Atmospheres* **106**, 3503-3509. (DOI:10.1029/2000jd900731).
- [62] Pastorello G, Trotta C, Canfora E, Chu H, Christianson D, Cheah Y-W, Poindexter C, Chen J, Elbashandy A, Humphrey M, et al. 2020 The FLUXNET2015 dataset and the ONEFlux processing pipeline for eddy covariance data. *Scientific Data* **7**, 225. (DOI:10.1038/s41597-020-0534-3).
- [63] Kish L. 1965 *Survey sampling*. New York, Wiley; 643 p.
- [64] Stoy PC, Mauder M, Foken T, Marcolla B, Boegh E, Ibrom A, Arain MA, Arneth A, Aurela M, Bernhofer C, et al. 2013 A data-driven analysis of energy balance closure across FLUXNET research sites: The role of landscape scale heterogeneity. *Agric. For. Meteorol.* **171-172**, 137-152. (DOI:10.1016/j.agrformet.2012.11.004).
- [65] Eder F, Schmidt M, Damian T, Traumner K, Mauder M. 2015 Mesoscale Eddies Affect Near-Surface Turbulent Exchange: Evidence from Lidar and Tower Measurements. *Journal of Applied Meteorology and Climatology* **54**, 189-206. (DOI:10.1175/jamc-d-14-0140.1).
- [66] Eshonkulov R, Poyda A, Ingwersen J, Wizemann HD, Weber TKD, Kremer P, Hög P, Pulatov A, Streck T. 2019 Evaluating multi-year, multi-site data on the energy balance closure of eddy-covariance flux measurements at cropland sites in southwestern Germany. *Biogeosciences* **16**, 521-540. (DOI:10.5194/bg-16-521-2019).
- [67] Kidston J, Brümmer C, Black TA, Morgenstern K, Nesic Z, McCaughey JH, Barr AG. 2010 Energy Balance Closure Using Eddy Covariance Above Two Different Land Surfaces and Implications for CO<sub>2</sub> Flux Measurements. *Bound.-Layer Meteor.* **136**, 193-218. (DOI:10.1007/s10546-010-9507-y).
- [68] Haverd V, Cuntz M, Leuning R, Keith H. 2007 Air and biomass heat storage fluxes in a forest canopy: Calculation within a soil vegetation atmosphere transfer model. *Agric. For. Meteorol.* **147**, 125-139. (DOI:10.1016/j.agrformet.2007.07.006).
- [69] Foken T. 2008 The energy balance closure problem: An overview. *Ecological Applications* **18**, 1351-1367. (DOI:10.1890/06-0922.1).
- [70] Foken T, Aubinet M, Finnigan JJ, Leclerc MY, Mauder M, U KTP. 2011 Results of a Panel Discussion About the Energy Balance Closure Correction for Trace Gases. *Bulletin of the American Meteorological Society* **92**, ES13-ES18.
- [71] Teuling AJ, Seneviratne SI, Stockli R, Reichstein M, Moors E, Ciais P, Luysaert S, van den Hurk B, Ammann C, Bernhofer C, et al. 2010 Contrasting response of European forest and grassland energy exchange to heatwaves. *Nat. Geosci.* **3**, 722-727. (DOI:10.1038/ngeo950).
